# Supplementary material
Source: Research Square preprint supplement (doi:10.21203/rs.3.rs-8826591/v1)
Supplement: Supplementary file 1 [file 329adec07da9da538a653ff5.docx]

1.Bolyen E, Rideout J R, Dillon M R, et al. Reproducible, interactive, scalable and extensible microbiome data science using QIIME 2[J]. Nature biotechnology, 2019, 37(8): 852-857.

2.Quast C, Pruesse E, Yilmaz P, et al. The SILVA ribosomal RNA gene database project: improved data processing and web-based tools[J]. Nucleic acids research, 2012, 41(D1): D590-D596.

3.Segata N, Izard J, Waldron L, et al. Metagenomic biomarker discovery and explanation[J]. Genome biology, 2011, 12(6): 1-18.
